# Supplementary material
Source: Springer Nature journal article supplement (https://www.springermedizin.de/resource/supplementary/12947_2009_304_MOESM2_ESM.pdf/9556658)

**Leaflets**

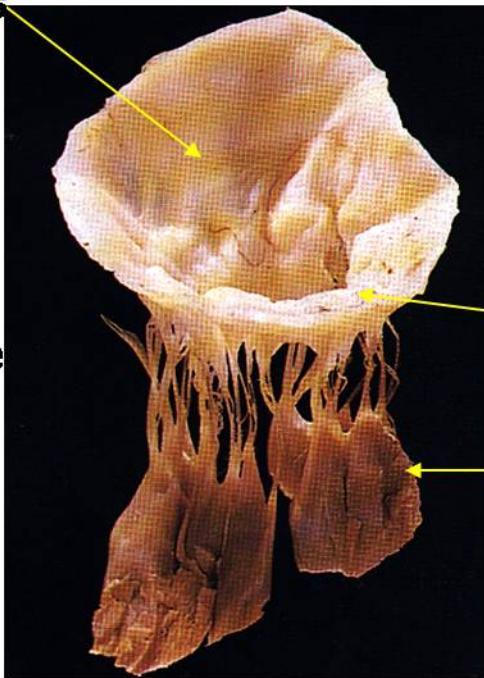

**Chordae**

**Annulus**

**Papillary  
muscles**

**Ventricular wall**

Supplement: MOESM2 [file 9556658]
